# Supplementary material for: Electrochemical Oxidation of Sodium Metabisulfite for Sensing Zinc Oxide Nanoparticles Deposited on Graphite Electrode
Source: MDPI journal article supplement (doi:10.3390/chemosensors10040145), 2022-04-13
Supplement: s1 [file s1]

Supplementary Material

# Electrochemical Oxidation of Sodium Metabisulfite for Sensing Zinc Oxide Nanoparticles Deposited on Graphite Electrode

Kailai Wang and Edward P. C. Lai \*

Department of Chemistry, Ottawa-Carleton Chemistry Institute, Carleton University Ottawa, ON K1S 5B6, Canada; kailaiwang@cmail.carleton.ca

\* Correspondence: edward.lai@carleton.ca; Tel.: +(613)-520-2600 (ext. 3835); Fax: +(613)-520-3749

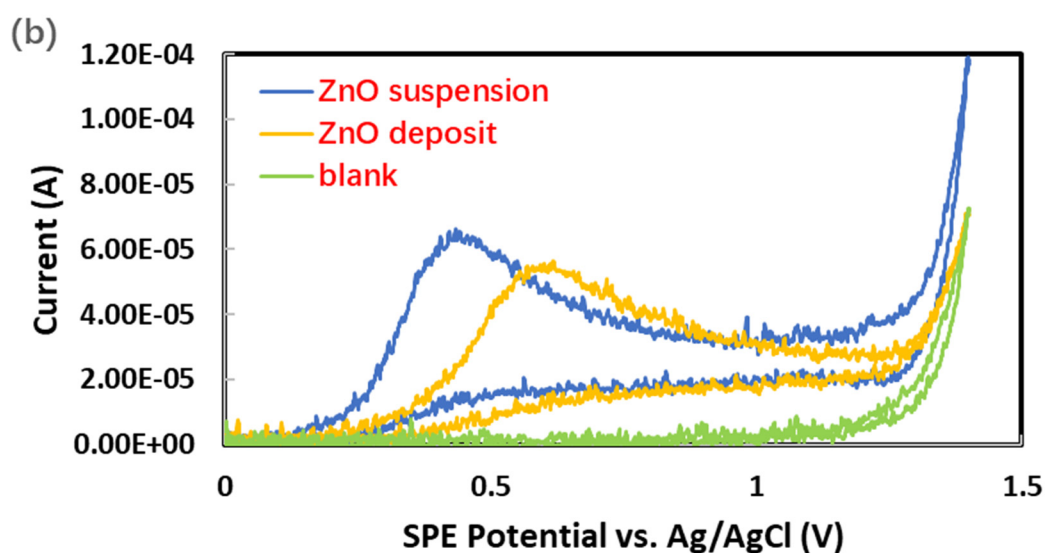

**Figure S1.** Cyclic voltammograms of ascorbic acid (both 0.003 M in 1.0 M KCl) on graphite electrode with ZnO suspension versus ZnO deposited on graphite electrode. Suspended ZnO concentration was 0.21 mg/ml for metabisulfite and 0.25 mg/ml for ascorbic acid. ZnO deposit on SPE used 150  $\mu$ L of each ZnO suspension.  $E_{\text{initial}} = 0.0$  V,  $E_{\text{final}} = 1.4$  V, scan rate = 0.10 V/s, scan direction = positive.

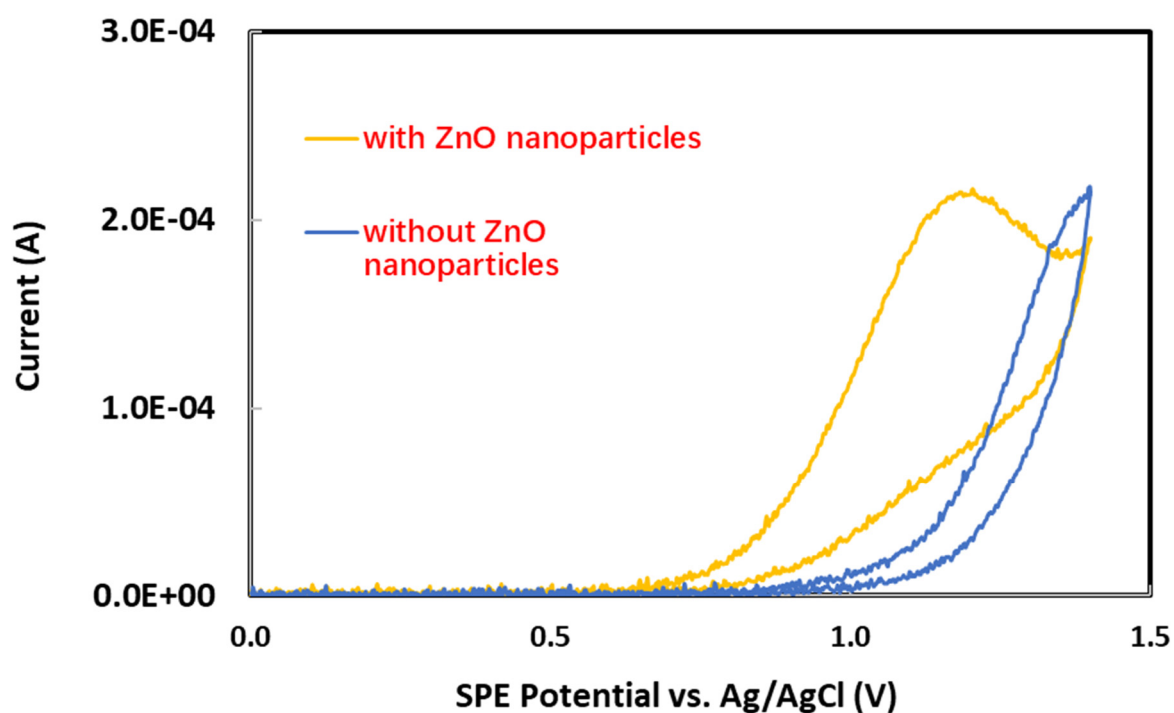

**Figure S2.** Cyclic voltammograms of sodium metabisulfite (0.0057 M) for 0  $\mu\text{g}$  and 115  $\mu\text{g}$  of ZnO nanoparticles deposited on graphite electrode.  $E_{\text{initial}} = 0.0 \text{ V}$ ,  $E_{\text{final}} = 1.4 \text{ V}$ , scan rate = 0.10 V/s, scan direction = positive.

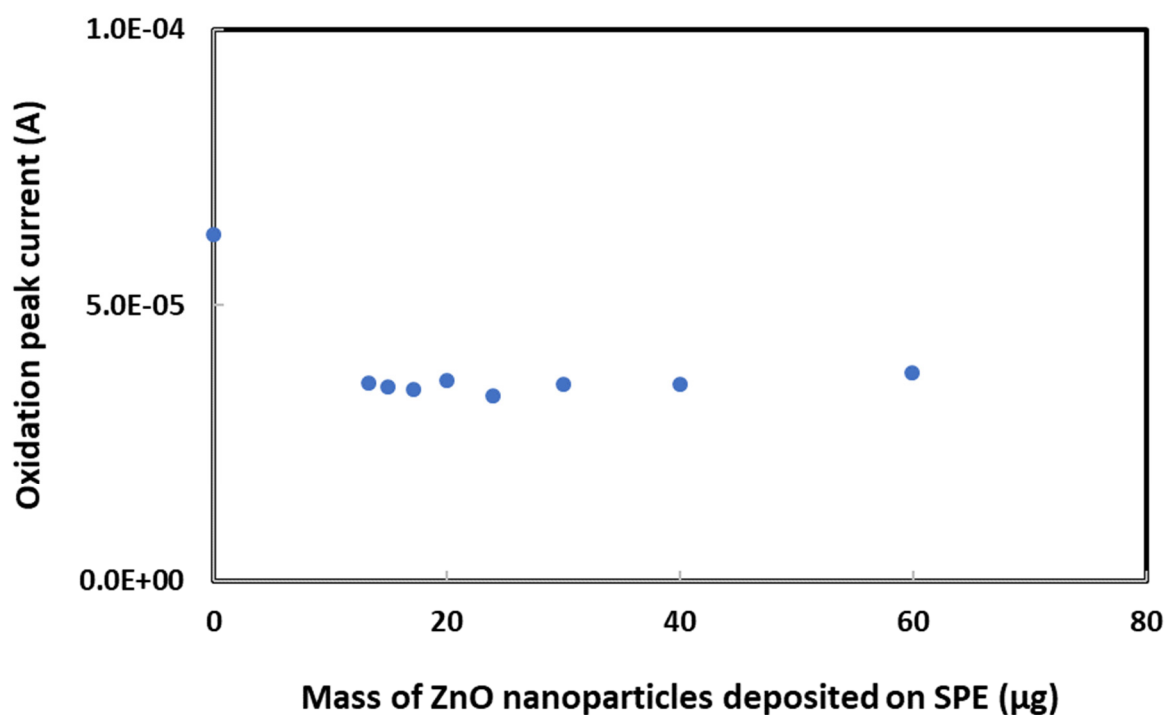

**Figure S3.** Cyclic voltammetric measurement results of potassium ferricyanide (0.006 M in 1.0 M KCl) oxidation peak current vs. mass of ZnO nanoparticles deposited on graphite electrode.

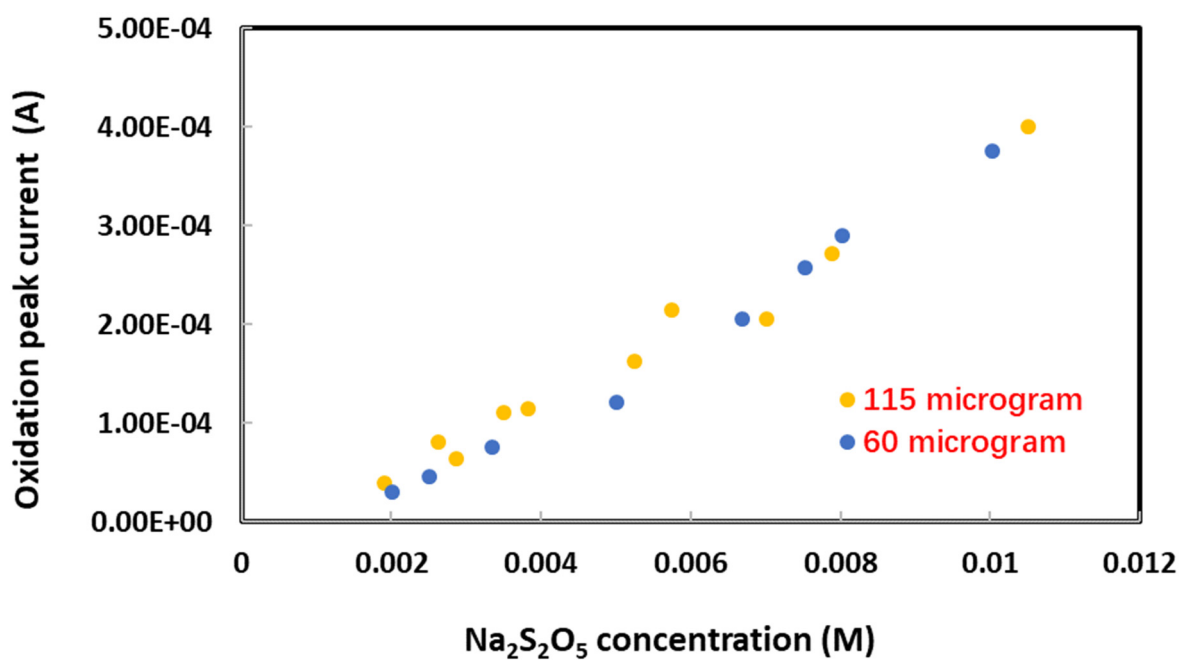

**Figure S4.** Cyclic voltammetric measurement results of oxidation peak current vs. sodium metabisulfite concentration in 1.0 M KCl. Mass of ZnO nanoparticles deposited on graphite electrode = 60  $\mu\text{g}$  or 115  $\mu\text{g}$ .

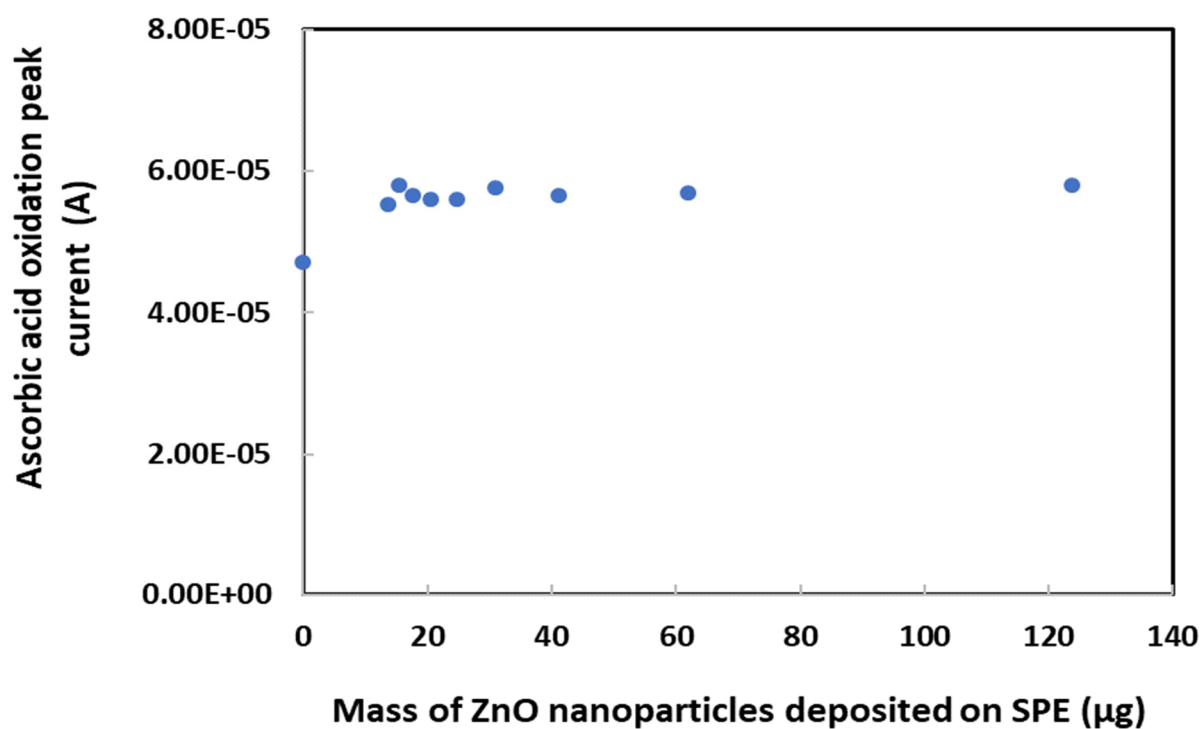

**Figure S5.** Cyclic voltammetric measurement results of ascorbic acid (0.003 M in 1.0 M KCl) oxidation peak current vs. mass of ZnO nanoparticles deposited on graphite electrode.

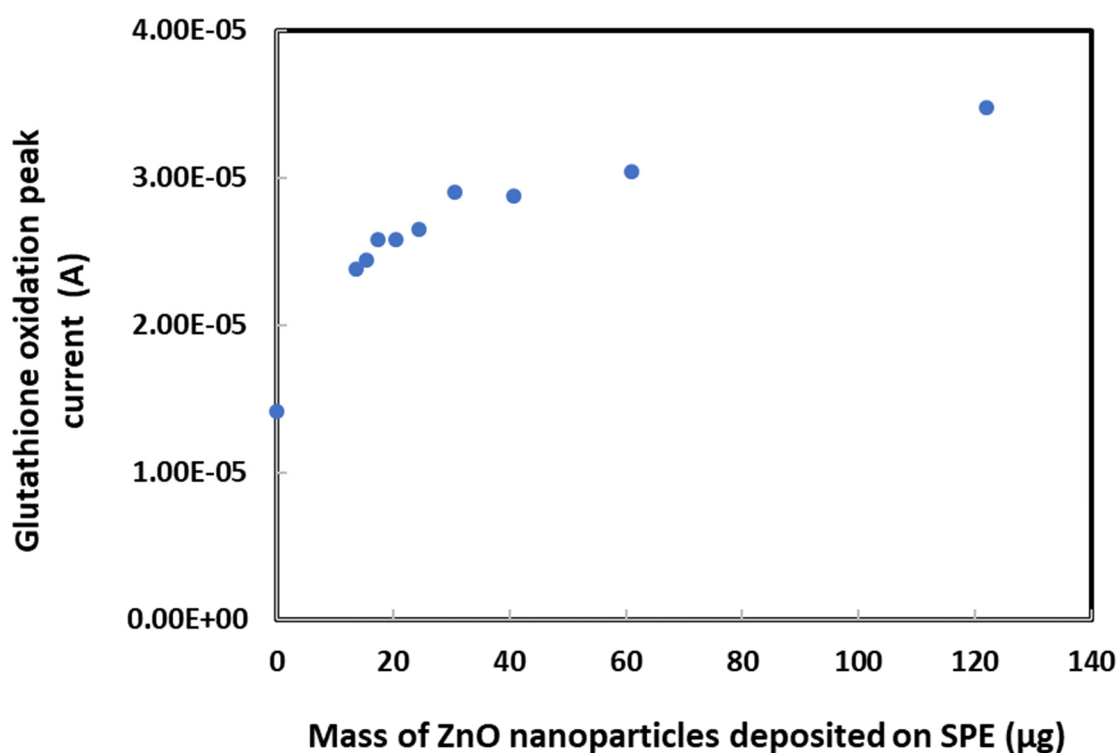

**Figure S6.** Cyclic voltammetric measurement results of glutathione (0.003 M in 1.0 M KCl) oxidation peak current vs. mass of ZnO nanoparticles deposited on graphite electrode. Each data point represents the average current measured between 1.19 V and 1.21 V versus Ag/AgCl reference electrode.
